# Supplementary material for: Bridging QTAIM with vibrational spectroscopy: the energy of intramolecular hydrogen bonds in DNA-related biomolecules
Source: Royal Society of Chemistry journal article supplement (doi:10.1039/c2cp40176b), 2012-01-01
Supplement: c2cp40176b.pdf [file c2cp40176b.pdf]

**Supplementary material for**  
**“Bridging QTAIM with vibrational spectroscopy: the energy of intramolecular hydrogen**  
**bonds in DNA-related biomolecules”**  
(T.Yu.Nikolaienko, L.A.Bulavin, D.M.Hovorun)

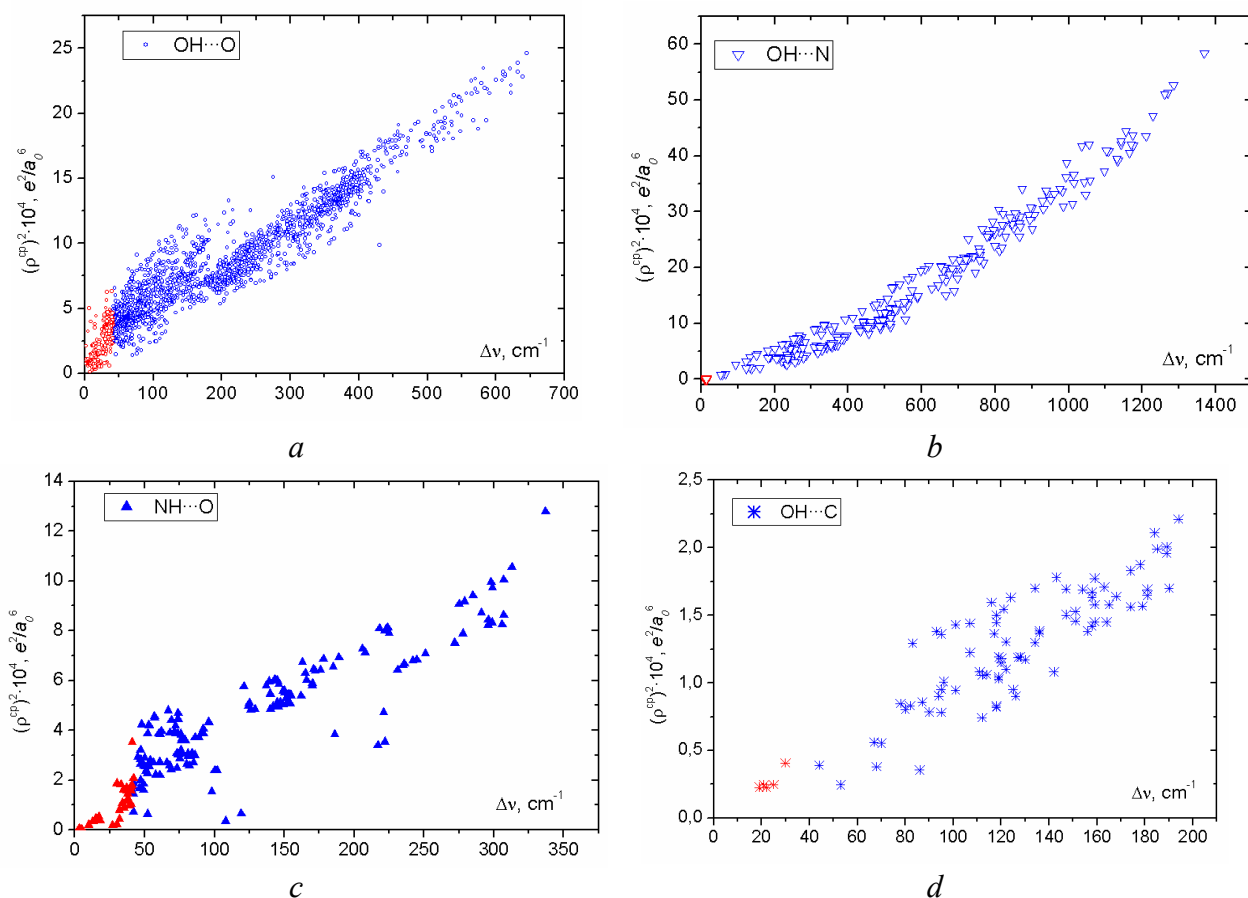

Figure SF1. Correlation between hydrogen bond proton donation group stretching frequency redshift ( $\Delta\nu$ ) and the square of the electron charge density at the bond critical point ( $(\rho^{\text{cp}})^2$ ) on the bond path corresponding to hydrogen bond for OH...O (a), OH...N (b), NH...O (c) and OH...C (d) bonds. Red color denotes points with  $0 \text{ cm}^{-1} < \Delta\nu < 40 \text{ cm}^{-1}$ . Linear regression correlation coefficients are: 0.956 (OH...O;  $(\rho^{\text{cp}})^2 = 3.10 \cdot 10^{-6} \cdot \Delta\nu + 2.20 \cdot 10^{-4}$ ), 0.977 (OH...N;  $(\rho^{\text{cp}})^2 = 4.05 \cdot 10^{-6} \cdot \Delta\nu - 6.50 \cdot 10^{-4}$ ), 0.913 (NH...O;  $(\rho^{\text{cp}})^2 = 2.80 \cdot 10^{-6} \cdot \Delta\nu + 9.20 \cdot 10^{-5}$ ), 0.895 (OH...C;  $(\rho^{\text{cp}})^2 = 1.01 \cdot 10^{-6} \cdot \Delta\nu - 3.54 \cdot 10^{-7}$ ).

Table S1. Cartesian coordinates (in Angstroms) of (3S,4R)-3,4,5-trihydroxypentanal conformer optimized at DFT B3LYP level of theory exhibiting the maximum red-shift ( $78 \text{ cm}^{-1}$ ) of non-hydrogen-bonded hydroxyl group O16–H19

DFT B3LYP/6-31G(d,p) using *ultrafine* grid and *tight* convergence criteria

| Atom | x         | y         | z         |
|------|-----------|-----------|-----------|
| O1   | 3.733056  | 0.137090  | -0.304965 |
| C2   | 2.667706  | -0.225619 | 0.145543  |
| H3   | 2.590631  | -0.694098 | 1.148116  |
| C4   | 1.350449  | -0.089710 | -0.591580 |
| C5   | 0.224477  | 0.417882  | 0.336888  |
| H6   | 1.081287  | -1.089917 | -0.961820 |
| H7   | 1.507952  | 0.561829  | -1.457728 |
| C8   | -1.063029 | 0.737487  | -0.448002 |
| H9   | 0.542810  | 1.363423  | 0.793606  |
| O10  | 0.016578  | -0.483490 | 1.411440  |
| H11  | -0.610966 | -1.159899 | 1.103198  |
| C12  | -1.776684 | -0.494038 | -1.022362 |
| H13  | -0.792393 | 1.414874  | -1.271517 |
| O14  | -1.961399 | 1.382224  | 0.466201  |
| H15  | -2.613713 | 1.873365  | -0.051156 |
| O16  | -2.252362 | -1.330071 | 0.031002  |
| H17  | -1.109232 | -1.101816 | -1.640254 |
| H18  | -2.609507 | -0.166692 | -1.665498 |
| H19  | -2.691369 | -0.723111 | 0.650707  |

DFT B3LYP/cc-pVTZ using *ultrafine* grid and *tight* convergence criteria

| Atom | x            | y            | z            |
|------|--------------|--------------|--------------|
| O1   | 3.711832000  | 0.176862000  | -0.307700000 |
| C2   | 2.670550000  | -0.246293000 | 0.127404000  |
| H3   | 2.627914000  | -0.766326000 | 1.102108000  |
| C4   | 1.346916000  | -0.117356000 | -0.586991000 |
| C5   | 0.233668000  | 0.384740000  | 0.352506000  |
| H6   | 1.076963000  | -1.113441000 | -0.954515000 |
| H7   | 1.488295000  | 0.539365000  | -1.446788000 |
| C8   | -1.043375000 | 0.742687000  | -0.423274000 |
| H9   | 0.566478000  | 1.309888000  | 0.829472000  |
| O10  | 0.014638000  | -0.535993000 | 1.409767000  |
| H11  | -0.644201000 | -1.180851000 | 1.114957000  |
| C12  | -1.781551000 | -0.453414000 | -1.027179000 |
| H13  | -0.753243000 | 1.421189000  | -1.232706000 |
| O14  | -1.925744000 | 1.408429000  | 0.491005000  |
| H15  | -2.525356000 | 1.970015000  | -0.009170000 |
| O16  | -2.288062000 | -1.316933000 | -0.011523000 |
| H17  | -1.123345000 | -1.055791000 | -1.652740000 |
| H18  | -2.598009000 | -0.091415000 | -1.663321000 |
| H19  | -2.774052000 | -0.753742000 | 0.605513000  |

Table S2. Conformational parameters (deg.) of canonical ribo- and 2'-deoxyribonucleosides conformers containing intramolecular OH...O, NH...O, OH...N or OH...C hydrogen bonds with the highest energy

| H-bond                                                                                                                                      | O <sub>2</sub> H...O <sub>2</sub> | O <sub>5</sub> H...N <sub>3</sub> | N <sub>2</sub> H...O <sub>5</sub> | O <sub>5</sub> H...C <sub>8</sub> |
|---------------------------------------------------------------------------------------------------------------------------------------------|-----------------------------------|-----------------------------------|-----------------------------------|-----------------------------------|
| Molecule name <sup>a</sup>                                                                                                                  | rC                                | rG                                | rG                                | rG                                |
| Conformer number <sup>b</sup>                                                                                                               | <b>16</b>                         | <b>6</b>                          | <b>118</b>                        | <b>75</b>                         |
| Proper citation <sup>b</sup>                                                                                                                | [R1]                              | [R2]                              | [R2]                              | [R2]                              |
| Conformational parameters <sup>c</sup> (deg.)                                                                                               |                                   |                                   |                                   |                                   |
| β (C <sub>4</sub> C <sub>5</sub> O <sub>5</sub> H)                                                                                          | 68.7                              | 60.9                              | -49.7                             | 85.7                              |
| γ (C <sub>3</sub> C <sub>4</sub> C <sub>5</sub> O <sub>5</sub> )                                                                            | -75.4                             | 46.5                              | -17.2                             | 46.0                              |
| ε (C <sub>4</sub> C <sub>3</sub> O <sub>3</sub> H)                                                                                          | 145.7                             | 31.3                              | 86.3                              | -163.3                            |
| χ (O <sub>4</sub> C <sub>1</sub> N <sub>1</sub> C <sub>2</sub> in rC,<br>O <sub>4</sub> C <sub>1</sub> N <sub>9</sub> C <sub>4</sub> in rG) | -171.9                            | 55.2                              | 49.5                              | 170.9                             |
| η (C <sub>3</sub> C <sub>2</sub> O <sub>2</sub> H)                                                                                          | 151.3                             | 22.7                              | 73.4                              | 40.3                              |
| <i>P</i>                                                                                                                                    | 163.9                             | 168.2                             | 356.0                             | 234.0                             |
| <i>v</i> <sub>max</sub>                                                                                                                     | 35.5                              | 32.7                              | 34.6                              | 25.9                              |

<sup>a</sup>: molecule names: rC – cytidine (IUPAC Name: 4-amino-1-[(2R,3R,4S,5R)-3,4-dihydroxy-5-(hydroxymethyl)oxolan-2-yl]pyrimidin-2(1H)-one), rG – guanosine (IUPAC Name: 2-amino-9-[(2R,3R,4S,5R)-3,4-dihydroxy-5-(hydroxymethyl)oxolan-2-yl]-1,9-dihydro-6H-purin-6-one);

<sup>b</sup> conformer numbers according to the following papers:

rC: [R1] R.O. Zhurakivsky and D.M. Hovorun, *Physics of the Alive*, 2007, **15**(1), 92,

rG: [R2] R.O. Zhurakivsky and D.M. Hovorun, *Physics of the Alive*, 2007, **15**(2), 24;

<sup>c</sup> atom numbers are given in accordance with: W. Saenger, *Principles of nucleic acid structure*, Springer-Verlag, 1984; *P* and *v*<sub>max</sub> denote furanose ring pseudorotation phase angle and pseudorotation amplitude correspondingly.
